# Supplementary material
Source: publisher figshare collection journal article supplement (https://sage.figshare.com/ndownloader/files/18037940)
Supplement: Supplementary file 1 [file 18037940]

**Appendix 6.** Model selection table for (generalized) linear models (linear models for structure and generalized linear models for climate) indicated by response variable: 1) species richness and 2) abundance. Model selection for structural models was done by means of backward selection and for climatic models was done by means of forward selection; using the *drop1* and *add1* commands, respectively. Variation inflation factor (VIF) was used to assess the inclusion and exclusion of variables (in every case  $VIF < 5$ ). The table shows model intercept, degrees of freedom (df), AIC (Akaike Information Criteria), delta (AIC delta) and adjusted  $R^2$  (RsqAdj). Full models are indicated first, AIC delta in structural models is indicated in relation to the full model, whereas in climatic models is indicated in relation to the final model. Final models are bolded.

| Response variable       | Model                                                                                         | Intercept   | df       | AIC            | delta       | Rsq Adj     |
|-------------------------|-----------------------------------------------------------------------------------------------|-------------|----------|----------------|-------------|-------------|
| <b>Species richness</b> | <b>Structural</b>                                                                             |             |          |                |             |             |
|                         | DBH + Height + Surface + Elevation                                                            | 0.43        | 5        | 1057.5         | 0           | 24.5        |
|                         | <b>DBH + Height + Elevation</b>                                                               | <b>0.43</b> | <b>6</b> | <b>1055.5</b>  | <b>2</b>    | <b>24.6</b> |
|                         | DBH + Height                                                                                  | 0.43        | 4        | 1088.5         | 33.1        | 21.2        |
|                         | <b>Climatic</b>                                                                               |             |          |                |             |             |
|                         | AMT + MTWM + MTCM + MTWeQ + MTDQ + MTCQ + MTWaQ + AP + PWeQ + PDQ + PWaQ + PCQ + AMTsQ + APsq | 1.7         | 16       | 156.41         | 16          | 75.9        |
|                         | PWaQ                                                                                          | 1.82        | 2        | 142.34         | 2           | 34          |
|                         | PWaQ + MTWeQ                                                                                  | 1.81        | 3        | 140.44         | 0.1         | 45.7        |
|                         | PWaQ + MTWeQ + AP + PCQ                                                                       | 1.81        | 5        | 144.35         | 4           | 46          |
|                         | <b>MTWeQ + PCQ</b>                                                                            | <b>1.81</b> | <b>3</b> | <b>140.38</b>  | <b>0</b>    | <b>45.9</b> |
| <b>Abundance</b>        | <b>Structural</b>                                                                             |             |          |                |             |             |
|                         | DBH + Height + Surface + Elevation                                                            | 1.61        | 6        | 2308.5         | 0           | 39.4        |
|                         | DBH + Height + Elevation                                                                      | 1.61        | 5        | 2319.3         | 9.3         | 38.5        |
|                         | <b>DBH + Height</b>                                                                           | <b>1.61</b> | <b>4</b> | <b>2317.9</b>  | <b>10.8</b> | <b>38.5</b> |
|                         | <b>Climatic</b>                                                                               |             |          |                |             |             |
|                         | AMT + MTWM + MTCM + MTWeQ + MTDQ + MTCQ + MTWaQ + AP + PWeQ + PDQ + PWaQ + PCQ + AMTsQ + APsq | 5.26        | 16       | 1477.32        | -7641.21    | 86.6        |
|                         | <b>APsq</b>                                                                                   | <b>5.92</b> | <b>2</b> | <b>9118.53</b> | <b>0</b>    | <b>2.4</b>  |
